# Supplementary material for: Small intestinal CD8+TCRγδ+NKG2A+ intraepithelial lymphocytes have attributes of regulatory cells in patients with celiac disease
Source: JCI journal article supplement (doi:10.1172/jci30989), 2008-01-02
Supplement: sd1 [file 1]

Supplemental Figure 1

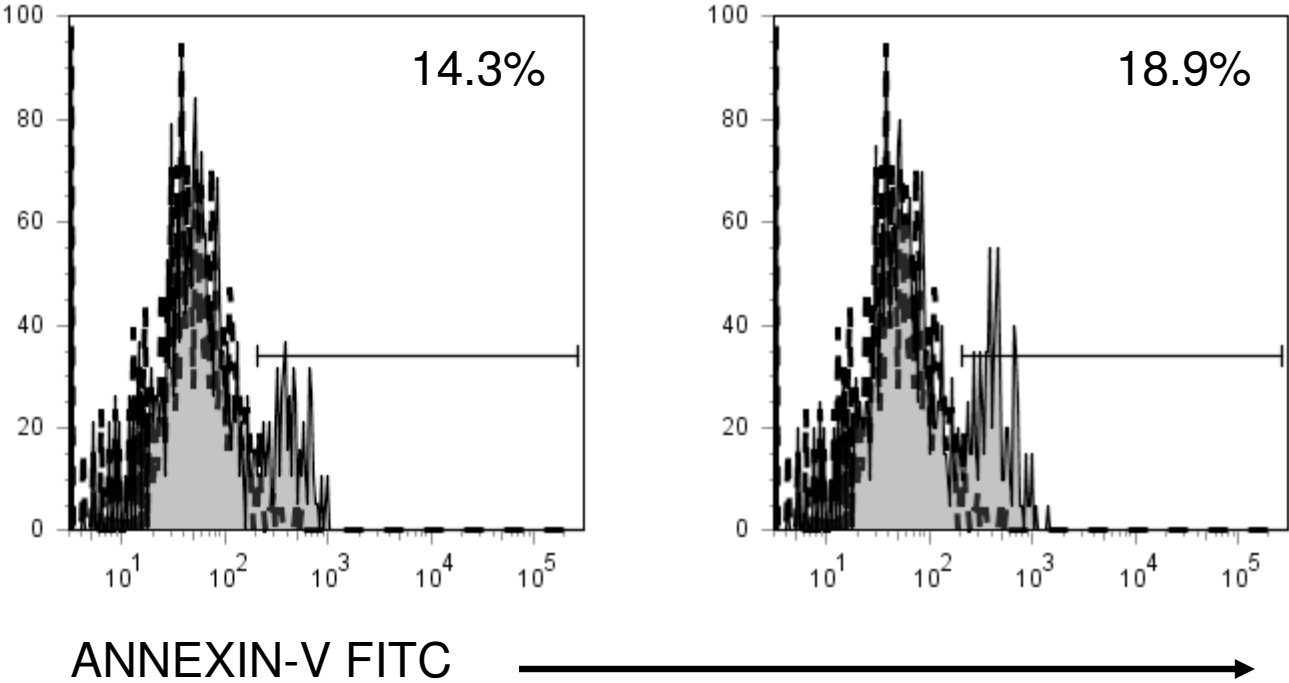

**Supplemental Figure 1:** Representative flow cytometry histograms showing Annexin-V FITC expression by CD3<sup>+</sup>TCRαβ<sup>+</sup> IELs after 24hrs, in the absence (top panel solid line) or presence (bottom panel solid line) of CD3<sup>+</sup>CD8<sup>+</sup>TCRγδ<sup>+</sup> IELs. Dashed line represents Annexin-V FITC expression by freshly isolated CD3<sup>+</sup>TCRαβ<sup>+</sup> IELs
